# Supplementary material for: Deciphering microRNAs and Their Associated Hairpin Precursors in a Non-Model Plant, Abelmoschus esculentus
Source: PubMed Central journal article supplement (PMC5831935; doi:10.3390/ncrna3020019), 2017-03-31
Supplement: ncrna-03-00019-s001.pdf [file ncrna-03-00019-s001.pdf]

Article

# Deciphering microRNAs and Their Associated Hairpin Precursors in a Non-Model Plant, *Abelmoschus esculentus*

Kavitha Velayudha Vimala Kumar †, Nagesh Srikakulam †, Priyavathi Padmanabhan and Gopal Pandi \*

Supplementary Fig. S1. Sliding pattern of Small RNA Reads within a precursor.

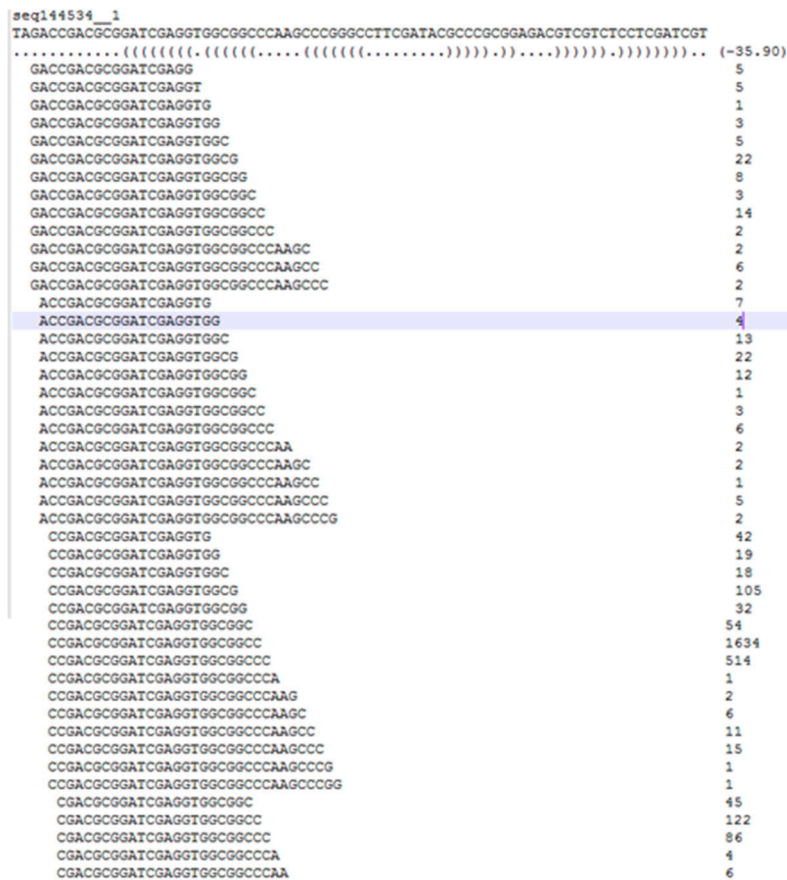

Fig. S1. Sliding pattern of Small RNA Reads within a precursor. Short reads from small RNA sequencing were mapped to the long reads of precursor sequencing by using perl scripts from miRGrep along with in-house built shell scripts. A sliding pattern of small reads was observed for many precursors as illustrated in figure S1.

**Supplementary Fig. S2. Reverse Transcription PCR and restriction digestion of miRNAs**

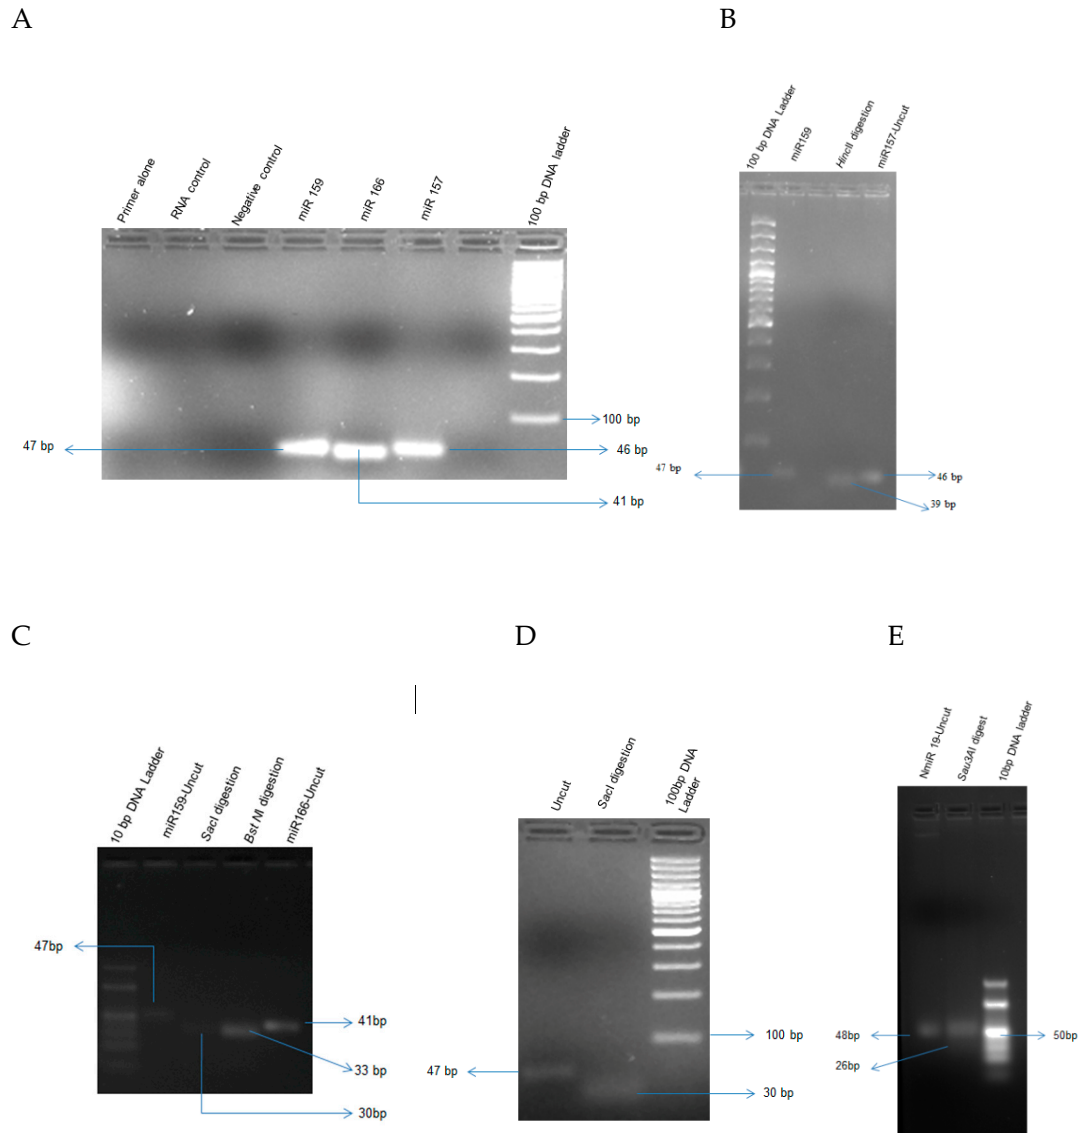

Fig. S2. Reverse transcription PCR and restriction digestion of miRNAs. PCR amplification was carried out for the randomly selected miRNAs from the reverse transcribed RNA (A). Amplified products were eluted and digested with specific restriction enzymes: *HincII* digestion for miRNA157 (B); *BstNI* digestion for miRNA166 (C); *SacI* digestion for miRNA159 (D); and *Sau3AI*

digestion for NmiRNA19 (E), to ensure genuine amplification prior to qRT-PCR. All gels are 2.5%.

**Table S1.** List of Novel miRNAs and their precursors

| miRNA ID | miRNA Sequence                         | Precursor Sequence                                                                                                          | MFEI      |
|----------|----------------------------------------|-----------------------------------------------------------------------------------------------------------------------------|-----------|
| NmiRNA1  | TCTTTC<br>CTACTC<br>CTCCCA<br>T        | TCTTTCCTACTCCTCCCATTCACGGGACGGAGGAGGCTAGGT                                                                                  | -0.750038 |
| NmiRNA2  | GCAAG<br>GCGCA<br>AGGAA<br>GCTG        | TTCCACAGCTTCTTGAACCTGCGAGTCAACGGGTTAGCAAACCCGCAAGGC<br>GCAAGGAAGCTGATTGGCGGGATCCCTCGCGGGTGCACCGCCGA                         | -0.750814 |
| NmiRNA3  | CGCGG<br>ATCGA<br>GGTGG<br>CGGC        | ACGCGGATCGAGGTGGCGGCCCAAGCCCGGGCCTTCGATACGCCCCGCGGAG<br>ACGTCGTCTCCTCGATCTGCGTTGATGAAGCAATTTTATTGTGGACTAGAGTTT<br>CTGATCTGG | -0.756122 |
| NmiRNA4  | TTTGGA<br>TGAA<br>GGGAG<br>CTCTA       | TTTGGATTGAAGGGAGCTCTATGCCATGGTGGTCTGCAGAGATTATCGAACC<br>TGGTATATCAGGGTTCCATATTGATCCA                                        | -0.767551 |
| NmiRNA5  | TATTTTC<br>CCCAG<br>ATGATC<br>GA       | TCCATTGTCGTCCAGTGGTTAGGATATCTGGGGAAGTGATGATTATTTCCCCA<br>GATGATCGAAGCTGAACAAACTGTGCGATTTT                                   | -0.905393 |
| NmiRNA6  | TGTAGT<br>ATAGT<br>GGTAA<br>GTATTC     | GTCGTTGTAGTATAGTGGAAGTATTCCC CGGCAAGGGATGAATATTTATCT<br>TATCCTACACT                                                         | -0.715473 |
| NmiRNA7  | TTGTAG<br>TATAGT<br>GGTGA<br>GTAT      | GTCGTTGTAGTATAGTGGTGAGTATTCTGGCAAGAGATGAATACTTATTCTA<br>TCTTACACT                                                           | -0.770827 |
| NmiRNA8  | TGTGTT<br>TGGAG<br>AGGTG<br>GAT        | TTGGCATTCTGTCCACCTCCAGGTA CTCAAGATATTGTGTTTGGAGAGGTGGA<br>TAGATAGGACT                                                       | -0.813838 |
| NmiRNA9  | GTGGCT<br>GTAGTT<br>TAGTGG             | GGTGGCTGTAGTTTAGTGGTGAGAATTCCACGTTGTGGAATTCTCGGGTGCC<br>AAGGAACTCCAGTCACGTCCGC                                              | -0.827552 |
| NmiRNA10 | ATGTA<br>GCCAA<br>GTGGAT<br>CAAGG<br>C | TGTTTTCTCTGCCTTGATCTATATGCGCATGGCGGATGTAGCCAAGTGGATCA<br>AGGCAGTGG                                                          | -0.867742 |
| NmiRNA11 | TCGATA<br>AACCT<br>CTGCAT<br>CCAG      | TCGATAAACCTCTGCATCCAGGAGCAATGAGGATAATCTGCTCTTGTGATGAT<br>AGGGTTATC                                                          | -0.881449 |
| NmiRNA12 | CTTTTC<br>TTTTTC<br>TTATCC             | CTTTTCTTTTTCTTATCCTACATTTGAGGATGATGAAAAAGATCAGACGGAT                                                                        | -0.941243 |
| NmiRNA13 | GACCA<br>AAGAG<br>TCGGA<br>GGGGG       | ACCAGCATTCTTAAGACCAAAGAGTCCGAGGGGGGAAAGCTCTCCGTTCCCTG<br>GTTCTCCTGTAGCTGGA                                                  | -0.700042 |

|          |                                  |                                                                                                                     |           |
|----------|----------------------------------|---------------------------------------------------------------------------------------------------------------------|-----------|
| NmiRNA14 | TTCGTC<br>CCTCTA<br>ATATGT       | TCTTTTATGGTTCATATTCTGGATTGGGTTTCGTCCTCTAATATGTAATATAAG<br>ATGTAATAATGGGATGAACTAAGTTATAGGCATGAAAGTGAAGAACTCAAC<br>GG | -0.702688 |
| NmiRNA15 | ACTGG<br>AGGTCT<br>GTAGTT<br>CG  | TAAACTGGAGGTCTGTAGTTCGATCCTGCATGGGGGCACCTGGAATTCTCAGG<br>TGCCAAGGAACTCCAGTCACGTCCGC                                 | -0.704497 |
| NmiRNA16 | TTCGAT<br>ACGCC<br>CGCGG<br>AGA  | ACGTTCCCGTGGGCGGATCGAGGTGGCGGCCCAAGCCCGGGCCTTCGATACG<br>CCCGCGGAGACGTCGTCTCCTCGATCGT                                | -0.744643 |
| NmiRNA17 | AGACG<br>AAGCG<br>GAAGC<br>GAG   | CCCTTTGTCGCTTCGATTTCGTCGTTCGCTTAGGGGAAGCACCCGCGTGAG<br>CGGGAGTAGACGAAGCGGAAGCGAGAATGT                               | -0.746012 |
| NmiRNA18 | CCAGA<br>TATAG<br>AGATG<br>GCGAC | AAACCAGATATAGAGATGGCGACTAAGGTTGCTGTTCCATTATTATATAATT<br>TCAAGATCACAAATGGATCTATGA                                    | -0.748108 |

Novel miRNA sequences along with their corresponding precursor sequences are shown. NmiRNA denotes- Novel miRNA.

**Table S2.** List of Precursors of miRNAs from PMRD which are not present in miRBase

| miRNA ID      | miRNA Sequence            | Precursor Sequence                                                                   |
|---------------|---------------------------|--------------------------------------------------------------------------------------|
| MIR35-npr     | GGAATATGAGTG<br>TGTGACTT  | GGTAGTTCGACCCGCAAATTTATTTGTTTCTGTATTTCCGGAATA<br>TGAGTGTGTGACTTGTTAGAATTGATC         |
| MIRf10239-npr | CGCTTGGTGCAG<br>GTCGGG    | TCGCTTGGTGCAGGTCCGGAAATTACGATAGGTGTCAAGTGG<br>AGTGCA                                 |
| MIRf10238-npr | TGCCTGGCTCCCT<br>GTATGCCA | TGCCTGGCTCCCTGTATGCCACAATGTAGGCAAGGGAAGTCCG<br>CAAAATGG                              |
| MIRf11025-akr | TGCATTTGCACCT<br>GCACCT   | TGCATTTGCACCTGCACCTTCTCATTACGATAGGTGTCAAGTGG<br>AAGTGCA                              |
| MIRf10271-akr | TGGATTGAAGGG<br>AGCTCT    | TTTGGATTGAAGGGAGCTCTATGCCATGGTGGTCTGCAGAGAT<br>TATCGAACCTGGTATATCAGGGTTCCATATTGATCCA |
| MIRf10082-akr | TGCATTTGCACCT<br>GCACCT   | TGCATTTGCACCTGCACCTTCTCATTACGATAGGTGTCAAGTGG<br>AAGTGCA                              |
| MIRf11010-npr | TTCCACAGCTTTC<br>TTGAAC   | TTCCACAGCTTTCCTGAACCTTATTACGATAGGTGTCAAGTGGAA<br>GTGCA                               |
